# Supplementary material
Source: MDPI journal article supplement (https://www.mdpi.com/2673-9976/20/1/5)
Supplement: s1 [file s1]

**IECBM**  
**2022**

**The 2-nd International Electronic Conference on Biomolecules:  
Biomacromolecules and the Modern World Challenges**

# **Structure, properties and biological activity of chitosan salts with *L*- and *D*-aspartic acid**

**Anna Shipovskaya, Natalia Gegel, Xenia Shipenok, Olga Ushakova,  
Tatiana Lugovitskaya and Irina Zudina**

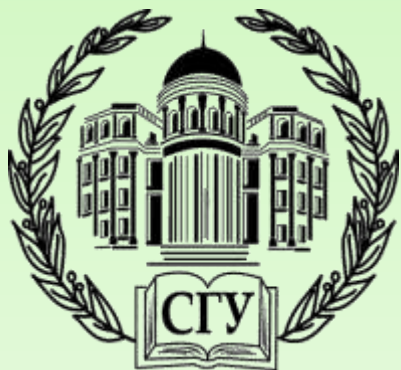

**Saratov State University, Russian Federation**

**1–15 November 2022**

# Abstract

A comprehensive study of the structure, properties and biological functionality of salt chitosan complexes with *L*- and *D*-aspartic acid (AspA) was carried out. It has been established that these polymer salts differ in spatial organization, chiroptic characteristics, surface charge, and macrocoil size. In experiments *in vitro* on a wide range of biological objects (unicellular algae, planktonic crustaceans, aerobic bacterial microorganisms, cell cultures, and test plants) it was found that the chitosan salt with *D*-AspA exhibited the best biological activity. The results obtained confirm our hypothesis that the biological homochiral hierarchy principles are most consistent with chitosan (*D*-aminoglucan) derivatives with the *D*-antipode of the acid.

## Preparation of chitosan aspartate

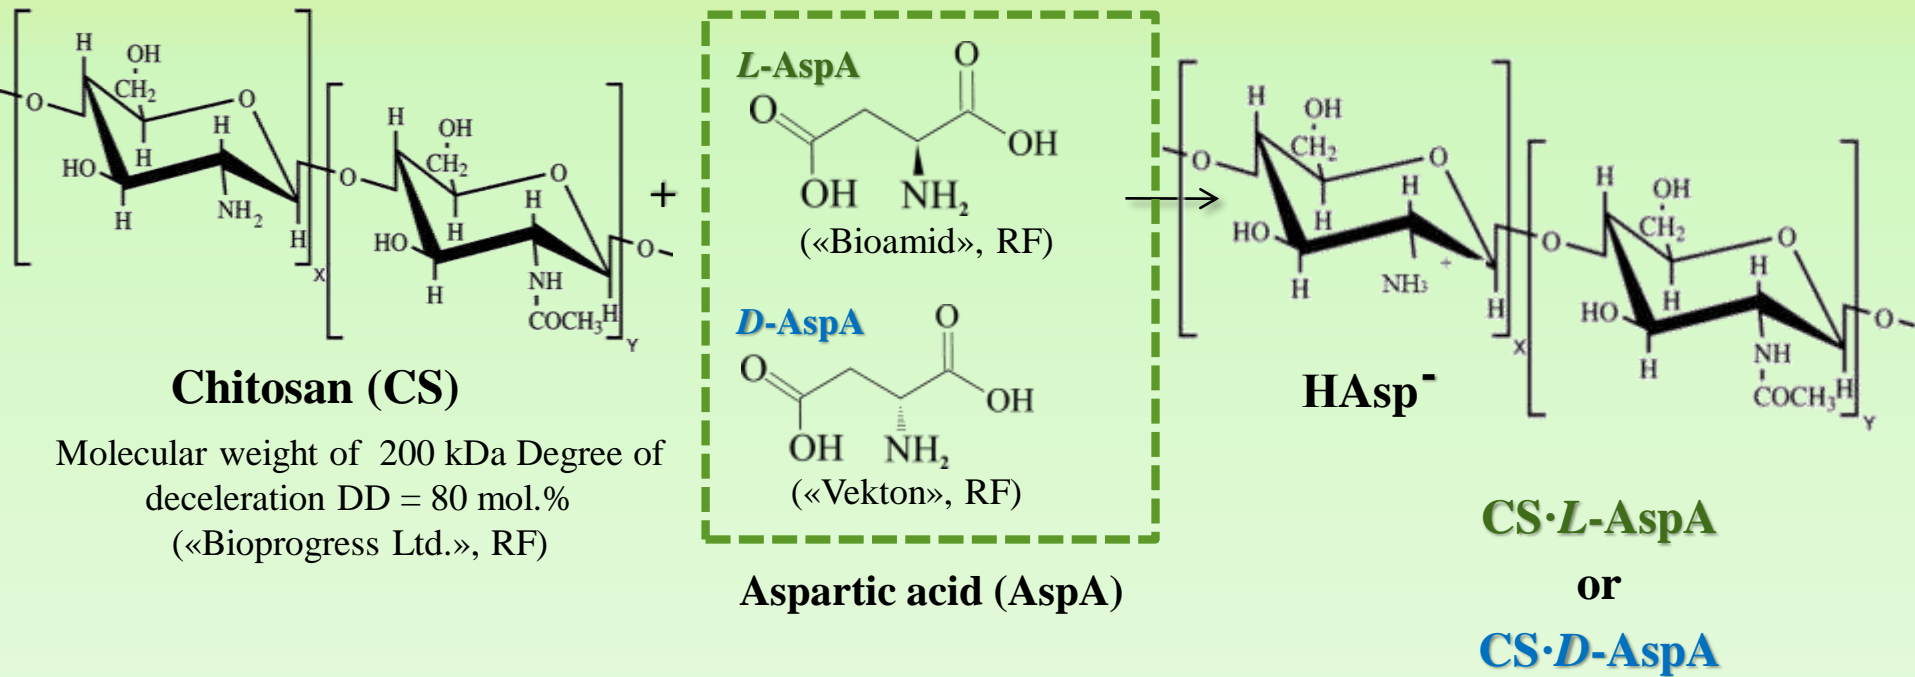

# SEM photos of the powders AspA

## *L*-AspA

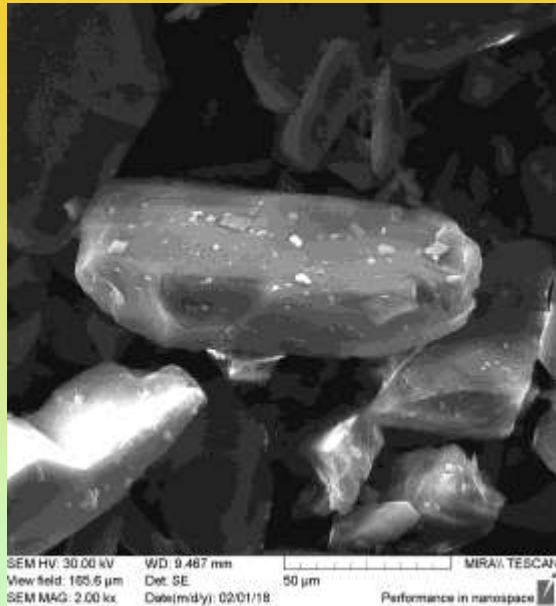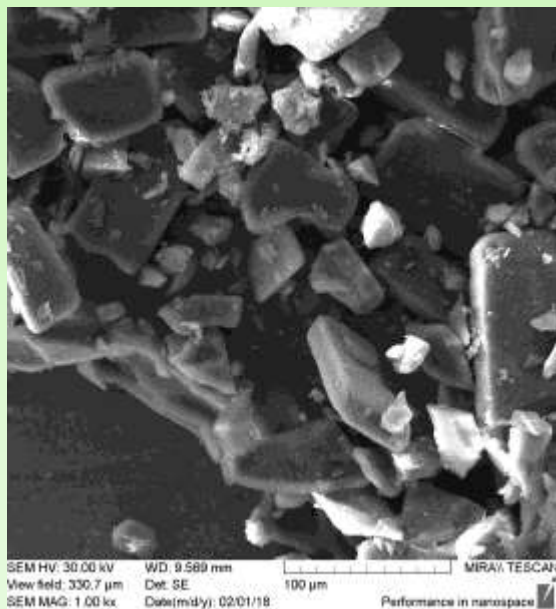

## *D*-AspA

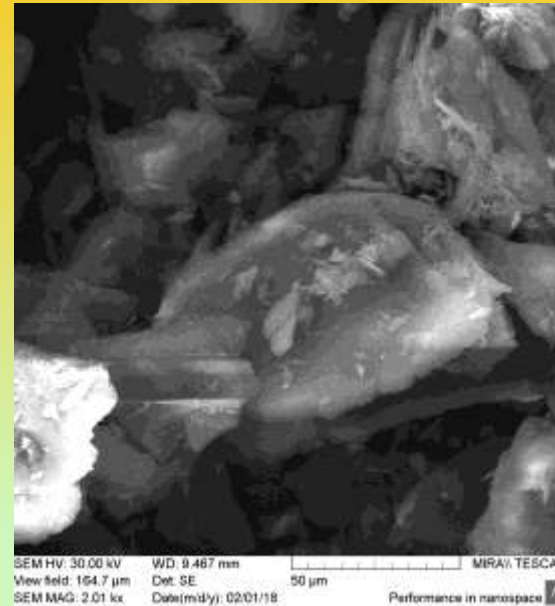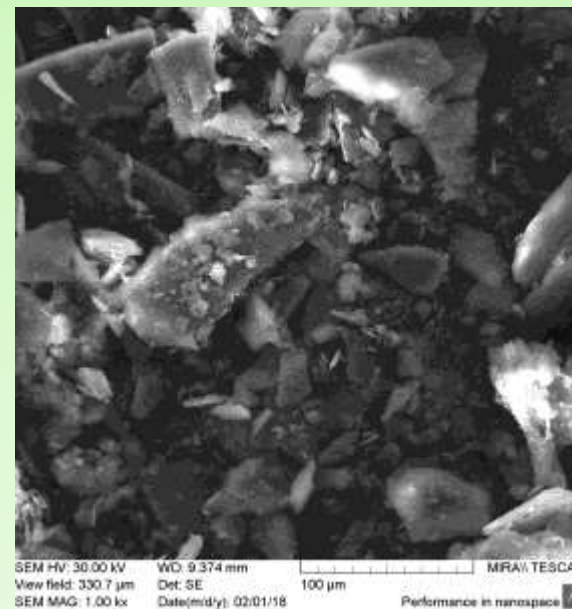

# IF spectroscopy

| Oscillation types                                                            | Wave numbers $\nu$ , $\text{cm}^{-1}$ |            |
|------------------------------------------------------------------------------|---------------------------------------|------------|
|                                                                              | CS·L-AspA                             | CS·D-AspA  |
| $\nu_{\text{O-H}}$                                                           | 3435                                  | 3440       |
| $\nu_{\text{N-H}}$                                                           | 3240                                  | 3260       |
| $\nu_{\text{N-H}} (\text{NH}_3^+)$                                           | 3125                                  | 3115       |
| $\nu_{\text{as}}(\text{CH})$                                                 | 2925                                  |            |
| $\nu_{\text{s}}(\text{CH})$                                                  | 2855                                  |            |
| $\nu_{\text{as}}(\text{C-N})$                                                | 2360                                  |            |
| $\nu_{\text{C=O}} (\text{COOH})$                                             | 1720                                  |            |
| $\delta_{\text{C=O}} (\text{Amide I})$                                       | 1630                                  |            |
| $\delta_{\text{N-H}} (\text{Amide II})$                                      | 1560                                  | 1550       |
| $\nu_{\text{C-O}} (\text{COO}^-)$                                            | 1460                                  | 1465       |
| $\delta_{\text{as}}(\text{CH})$                                              | 1400                                  |            |
| $\nu_{\text{C-N}} (\text{Amide III})$                                        | 1350, 1305                            |            |
| $\delta(\text{OH})$                                                          | 1225                                  |            |
| $\nu(\text{C-C}), \nu(\text{C-O}),$<br>$\nu(\text{C-N}), \delta(\text{C-H})$ | 1150                                  |            |
|                                                                              | 1020                                  | 1040, 1020 |
| Glucopyranose ring                                                           | 895                                   |            |

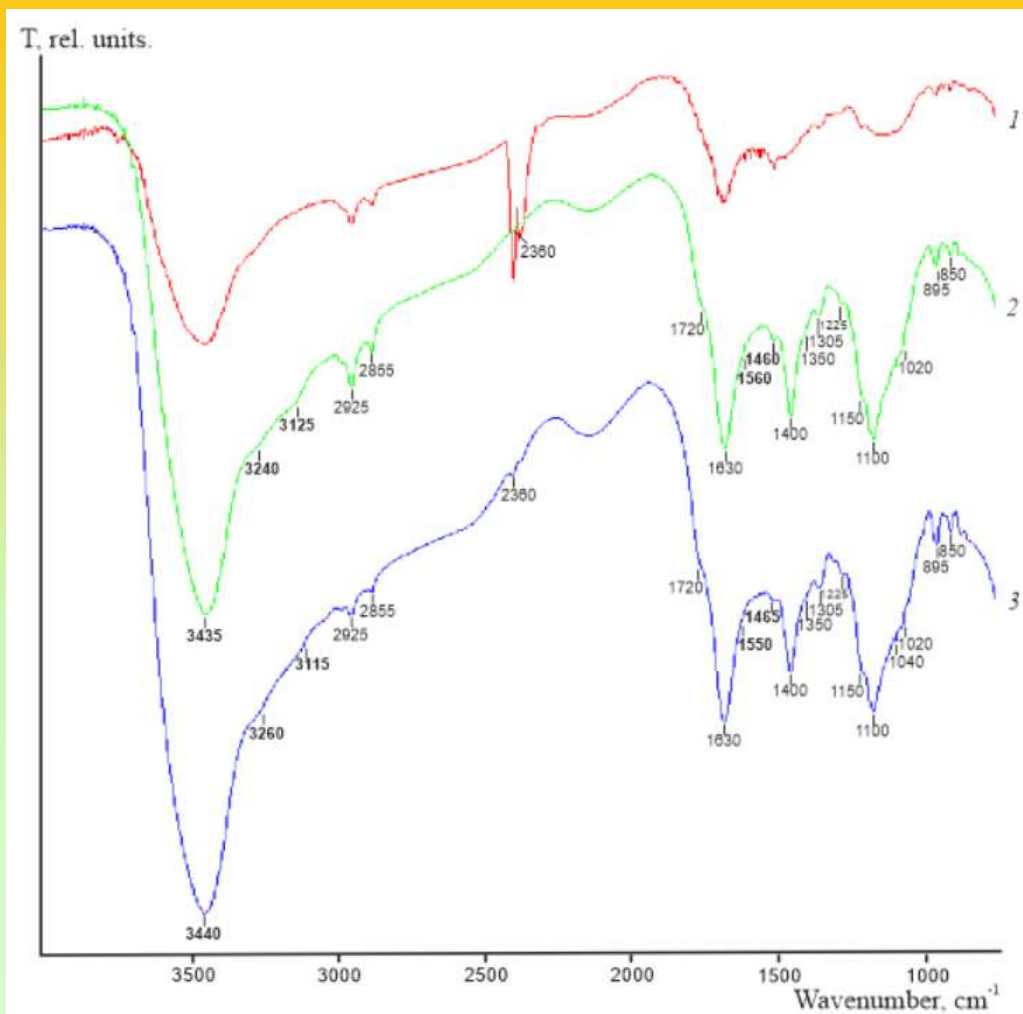

IR spectra of CS powders (1), CS·L-AspA (2) and CS·D-AspA (3)

**Vertex 70v vacuum FTIR spectrometer  
(BillERICA, MA, USA)**

# Chiroptic properties of solutions

## Circular dichroism (CD)

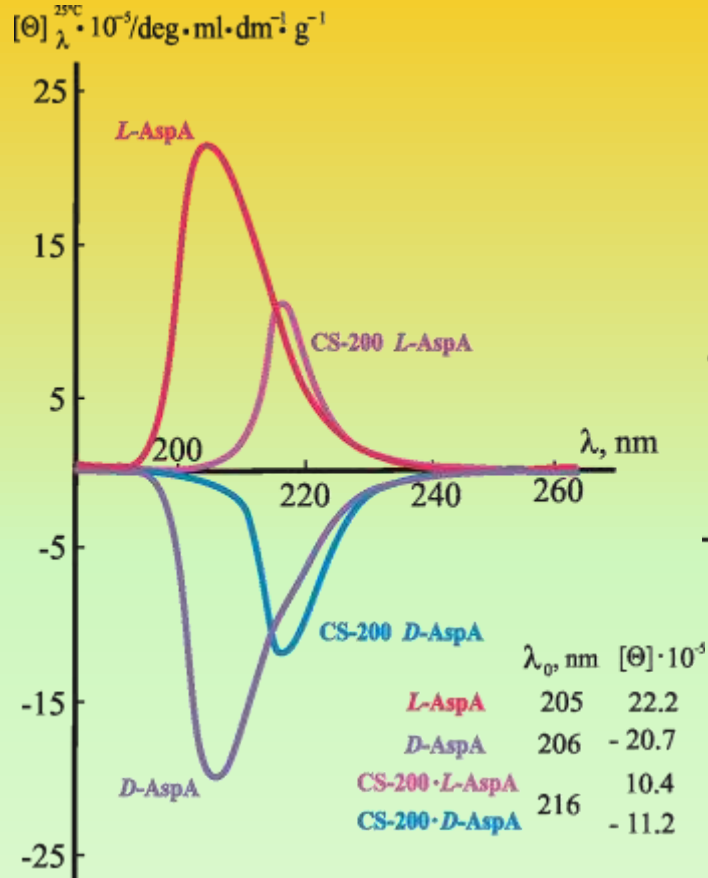

CD spectra of aqueous solutions of *L-AspA* (1), *D-AspA* (2), CS in *L-AspA* (3), and CS in *D-AspA* (4); the molar ratio  $[\text{AspA}]/[\sim\text{NH}_2] = 0.85$  mol/monomol.

Chirascan™ Spectrometer (Applied  
Photophysics Ltd, USA)

## Optical rotation dispersion (ORD)

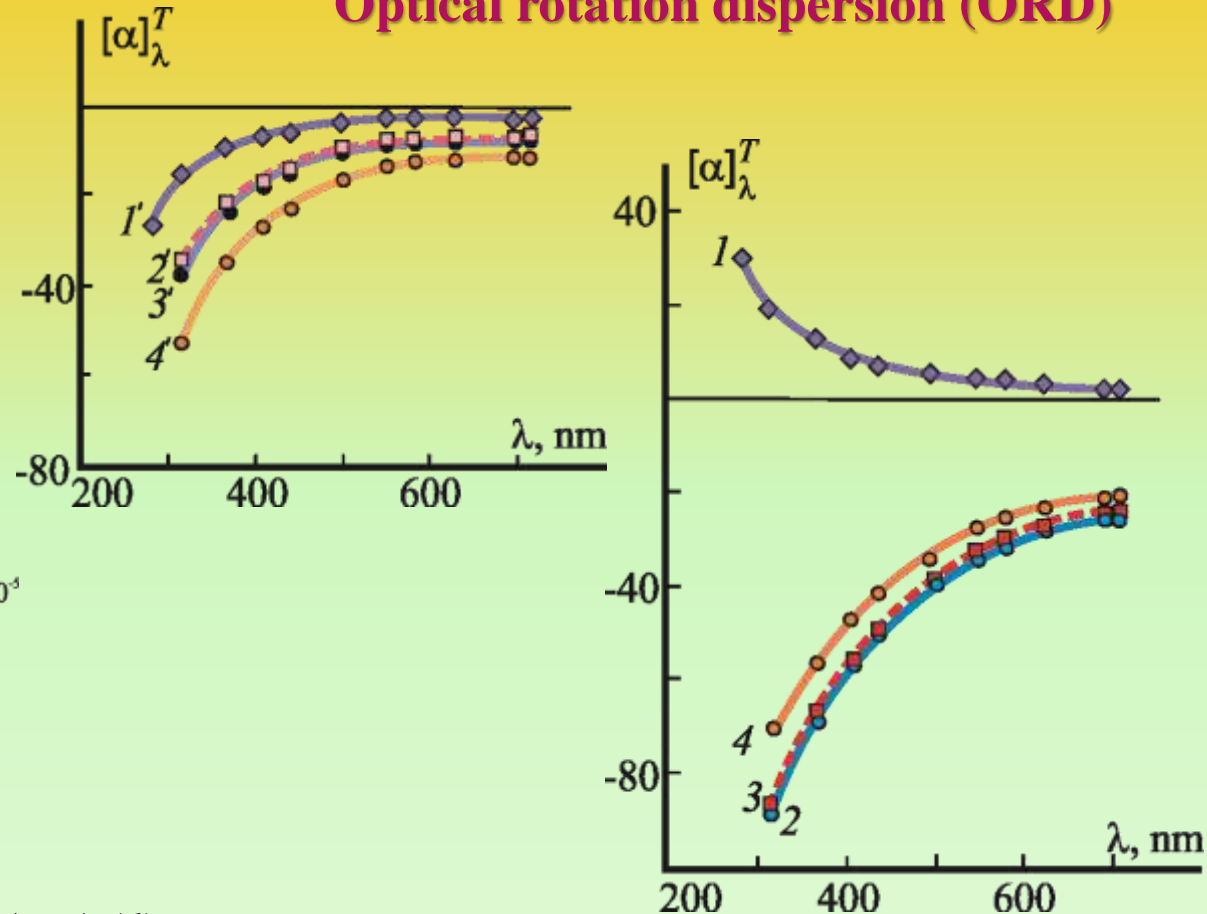

ORD curves for aqueous solutions of *L-AspA* (1), *D-AspA* (1'), CS in *L-AspA* (2–4), and CS in *D-AspA* (2'–4'); the molar ratio  $[\text{AspA}]/[\sim\text{NH}_2] = 0.85$  (2, 2'), 1.0 (3, 3') and 2.0 mol/monomol (4, 4').

Automatic SPU-E spectropolarimeter (RF)

# Hydrodynamic properties of solutions

Concentration dependences of the viscosity number (a, b) and the logarithm of the relative viscosity (c, d) of CS solutions in *L*-AspA (a, c) and *D*-AspA (b, d) with  $C_{AspA} = 1.5 \cdot 10^{-3}$  (1),  $3.0 \cdot 10^{-3}$  (2) and  $6.0 \cdot 10^{-3}$  mol/dL (3).

Ubbelohde capillary viscometer (Cannon Instrument Company", USA)  
 $d = 0.56$  mm

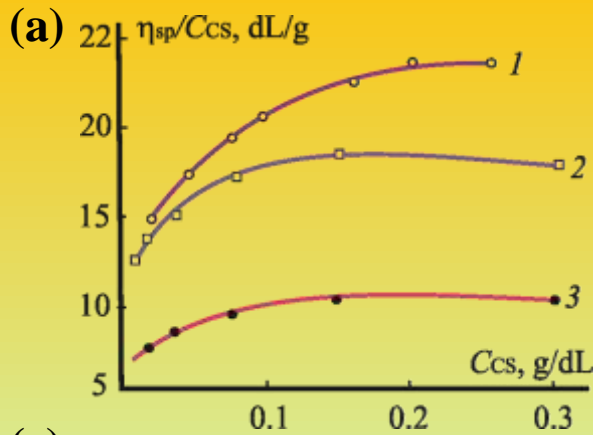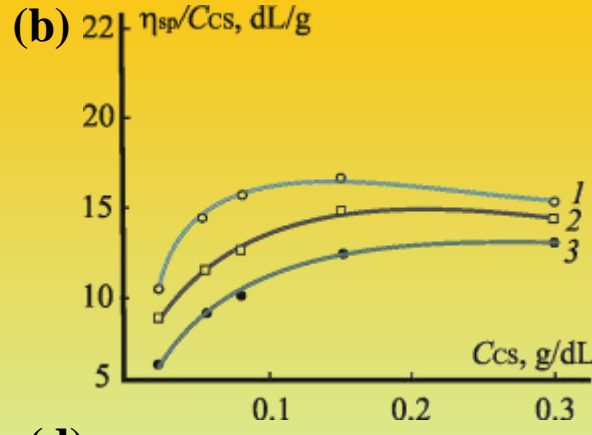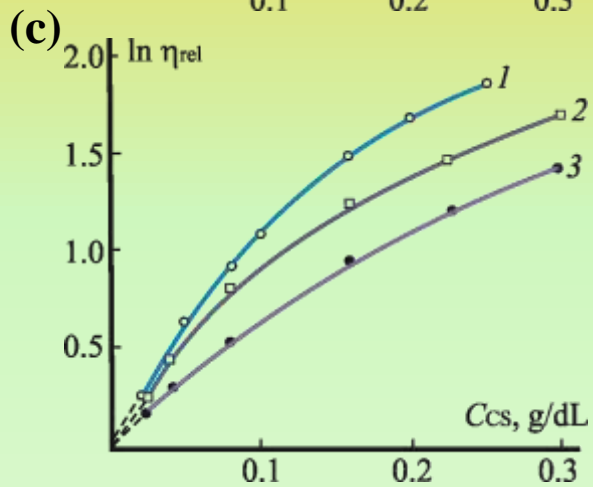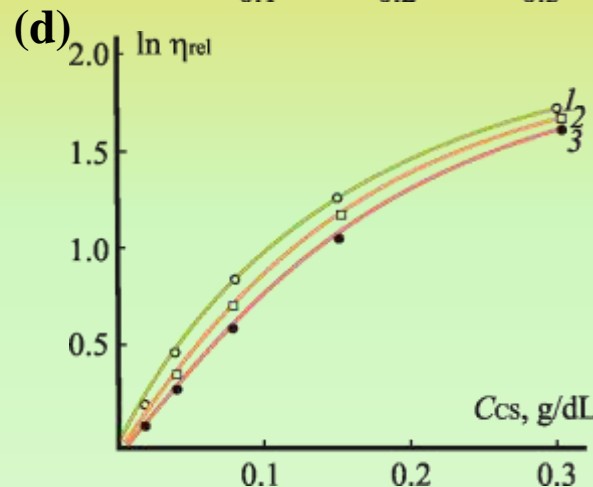

| $C_{AspA} \cdot 10^3$ , mol/dL | [ $\eta$ ], dL/g |           | $R_{ef, HM}$ |           |
|--------------------------------|------------------|-----------|--------------|-----------|
|                                | CS·L-AspA        | CS·D-AspA | CS·L-AspA    | CS·D-AspA |
| 1.5                            | 12.5             | 8.8       | 73           | 65        |
| 3.0                            | 11.1             | 8.4       | 71           | 64        |
|                                | 3.5*             | 2.1*      | 48*          | 41*       |
| 6.0                            | 7.5              | 6.8       | 62           | 60        |

\*  $I = const$  (0.17 M NaCl)

Limit number of viscosity

$$[\eta] = \partial \ln \eta_{rel} / \partial C_{CS}$$

[Wolf B.A. // *Macromolecular Rapid Communications*, 2007. Vol.28. No.2. P.164-170]

Effective radius of a macromolecular coil

$$R_{ef} = \sqrt[3]{\frac{3[\eta] \bar{M}_\eta}{10\pi N_a}}$$

# AFM of the surface of hydrogel plates

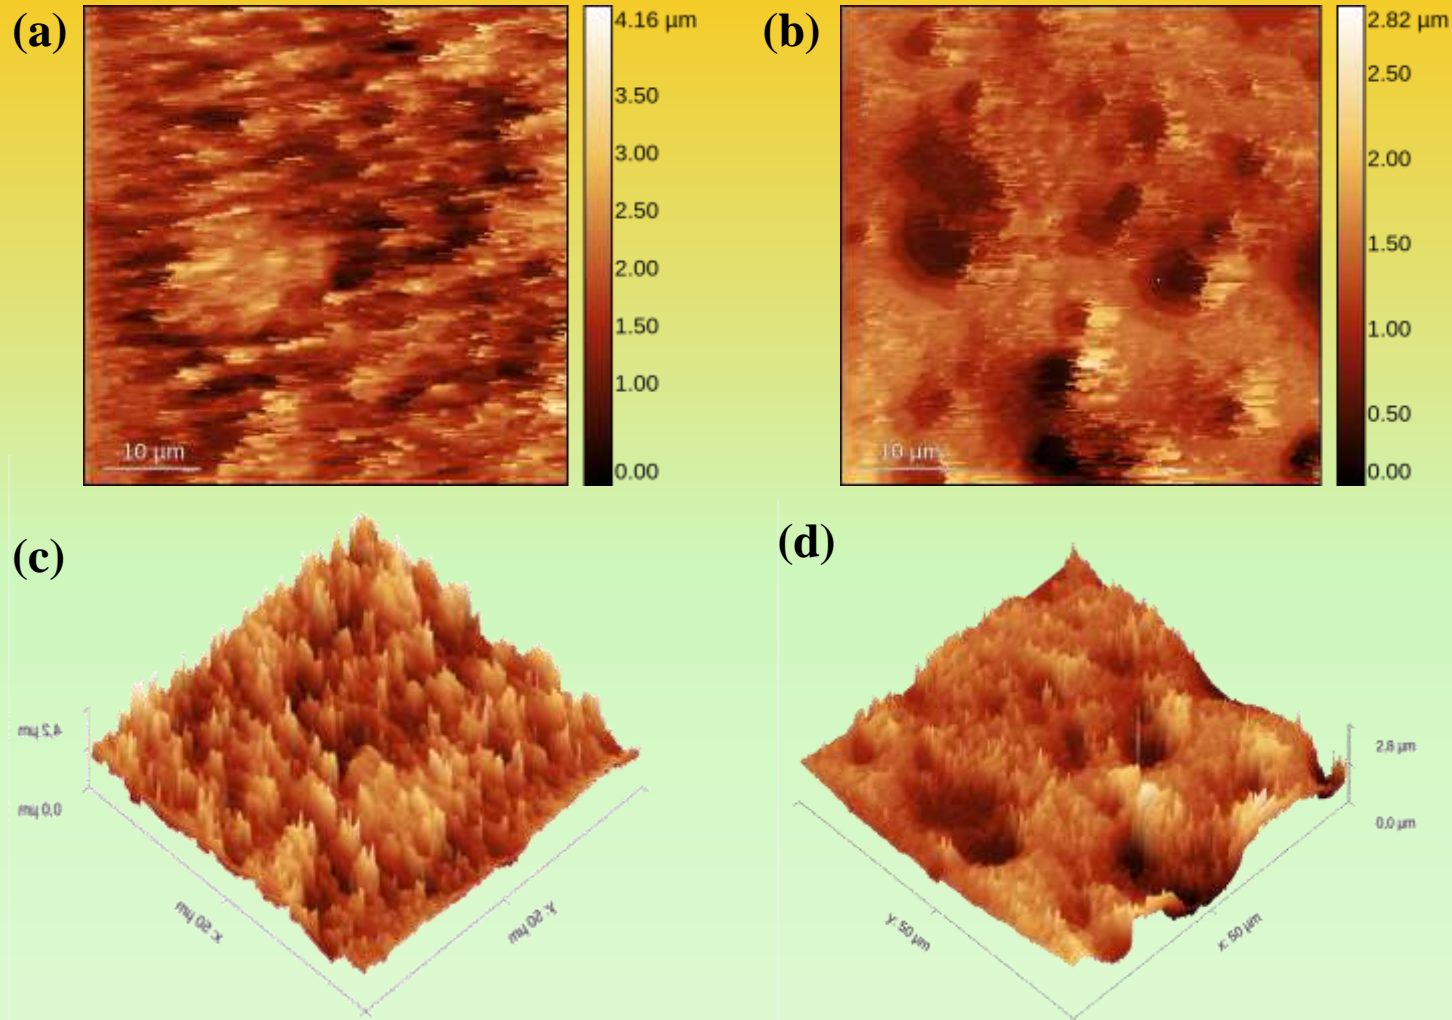

AFM images of the surface of hydrogel plates made of CS•L-AspA (a, c) and CS•D-AspA(b, d) obtained at the molar ratio of  $[\text{AspA}]/[\sim\text{-NH}_2] = 0.85$  mol/monomol.

# Multi-angle dynamic light scattering

| Parameter            | $C_{CS} \cdot 10^3$ ,<br>monomol/dL | Temperature, °C                                      |      |      |      |      |      |
|----------------------|-------------------------------------|------------------------------------------------------|------|------|------|------|------|
|                      |                                     | 25                                                   |      |      | 37   |      |      |
|                      |                                     | Molar ratio [AspA]/[~-NH <sub>2</sub> ], mol/monomol |      |      |      |      |      |
|                      |                                     | 0.85                                                 | 1.0  | 2.0  | 0.85 | 1.0  | 2.0  |
| <b>CS·L-AspA</b>     |                                     |                                                      |      |      |      |      |      |
| ζ-potential, mV      | 0.9                                 | 34.2                                                 | 39.3 | 40.5 | 37.1 | 38.2 | 38.9 |
|                      | 2.4                                 | 39.3                                                 | 39.3 | 35.6 | 33.3 | 37.9 | 35.9 |
|                      | 4.7                                 | 37.0                                                 | 39.6 | –    | 29.2 | 35.4 | –    |
| Wall ζ-potential, mV | 0.9                                 | 51.0                                                 | 51.8 | 41.5 | 52.2 | 53.6 | 49.5 |
|                      | 2.4                                 | 44.9                                                 | 38.9 | 42.5 | 38.6 | 41.5 | 48.6 |
|                      | 4.7                                 | 37.2                                                 | 29.6 | –    | 28.6 | 37.3 | –    |
| Conductivity, mS/cm  | 0.9                                 | 0.40                                                 | 0.39 | 0.51 | 0.47 | 0.46 | 0.61 |
|                      | 2.4                                 | 0.71                                                 | 0.67 | 0.84 | 0.85 | 0.80 | 1.01 |
|                      | 4.7                                 | 1.30                                                 | 1.24 | –    | 1.56 | 1.50 | –    |
| <b>CS·D-AspA</b>     |                                     |                                                      |      |      |      |      |      |
| ζ-potential, mV      | 0.9                                 | 36.5                                                 | 32.3 | 33.7 | 38.0 | 31.0 | 36.2 |
|                      | 2.4                                 | 37.9                                                 | 39.4 | 42.7 | 37.6 | 36.4 | 37.6 |
|                      | 4.7                                 | 42.3                                                 | 33.3 | –    | 34.8 | 35.5 | –    |
| Wall ζ-potential, mV | 0.9                                 | 36.2                                                 | 52.6 | 59.5 | 45.5 | 46.7 | 47.9 |
|                      | 2.4                                 | 37.3                                                 | 40.2 | 36.0 | 39.0 | 39.0 | 42.9 |
|                      | 4.7                                 | 27.9                                                 | 26.3 | –    | 21.9 | 29.9 | –    |
| Conductivity, mS/cm  | 0.9                                 | 0.44                                                 | 0.39 | 0.51 | 0.52 | 0.46 | 0.61 |
|                      | 2.4                                 | 0.83                                                 | 0.76 | 0.85 | 0.99 | 0.76 | 1.02 |
|                      | 4.7                                 | 1.68                                                 | 1.19 | –    | 2.02 | 1.44 | –    |



# Polarizing microscopy

Kinetics of crystallization of *L*-menthol in aqueous solutions of CS·*L*-AspA and CS·*D*-AspA

| $C_{CS} \cdot 10^3, \text{monomol/dL}^*$ | CS· <i>L</i> -AspA                                                                  |                                                                                      | CS· <i>D</i> -AspA                                                                    |                                                                                       |
|------------------------------------------|-------------------------------------------------------------------------------------|--------------------------------------------------------------------------------------|---------------------------------------------------------------------------------------|---------------------------------------------------------------------------------------|
|                                          | Extractive crystallization time, min                                                |                                                                                      |                                                                                       |                                                                                       |
|                                          | 5                                                                                   | 30                                                                                   | 5                                                                                     | 30                                                                                    |
| 1.8                                      | 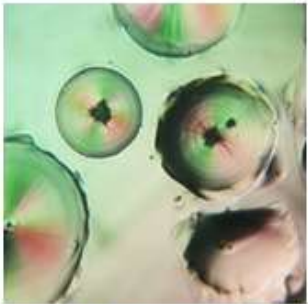   |    |    |    |
| 3.5                                      |   |   |   |   |
| 4.7                                      |  |  |  |  |

\*  $[\text{AspA}]/[\sim\text{-NH}_2] = 0.85 \text{ mol/monomol}$

Polarization microscope LaboPol-2 (RF), magnification  $\times 10$

# Complex formation with metal ions

| System               | Multiplicity of breeding, times | pH  | Complex formation ***, % |
|----------------------|---------------------------------|-----|--------------------------|
| <i>L</i> -AspA*      | 10                              | 5.5 | 47.9±0.7                 |
|                      | 100                             | 6.4 | 21.4±1.1                 |
|                      | 1000                            | 6.7 | 12.4±0.9                 |
| <i>D</i> -AspA*      | 10                              | 5.6 | 39.0±1.2                 |
|                      | 100                             | 6.5 | 10.1±0.8                 |
|                      | 1000                            | 6.7 | 6.40±0.7                 |
| CS· <i>L</i> -AspA** | 10                              | 5.9 | 89.6±1.4                 |
|                      | 100                             | 6.8 | 62.6±1.3                 |
|                      | 1000                            | 6.9 | 37.4±2.1                 |
| CS· <i>D</i> -AspA** | 10                              | 5.7 | 97.6±1.2                 |
|                      | 100                             | 6.6 | 92.2±0.9                 |
|                      | 1000                            | 6.8 | 79.8±1.7                 |

\*  $C_{\text{AspA}} = 0.8 \cdot 10^{-3} \text{ mol/dL}$

\*\*  $C_{\text{CS}} = 0.8 \cdot 10^{-3} \text{ monomol/dL}$ ,  $[\text{AspA}]/[\sim\text{-NH}_2] = 1.0 \text{ mol/monomol}$

\*\*\* Complex formation was assessed by the change in the chlorophyll fluorescence intensity of *S. quadricauda* microalgae cultivated in Prat's medium,  $t = 4$  days.

| Reagent                                                                               | Concentration, g/dm <sup>3</sup>  |
|---------------------------------------------------------------------------------------|-----------------------------------|
| Nutrient medium Prat                                                                  |                                   |
| Potassium nitrate, KNO <sub>3</sub>                                                   | 0.1                               |
| Potassium phosphate disubstituted, K <sub>2</sub> HPO <sub>4</sub> ·3H <sub>2</sub> O | 0.01                              |
| Magnesium sulfate, Mg <sub>2</sub> SO <sub>4</sub> ·7H <sub>2</sub> O                 | 0.01                              |
| Iron chloride, FeCl <sub>3</sub> ·6H <sub>2</sub> O                                   | 0.001                             |
| Bioobject                                                                             |                                   |
| <i>S. quadricauda</i>                                                                 | 30 thousand cells/cm <sup>3</sup> |

# Antibacterial activity

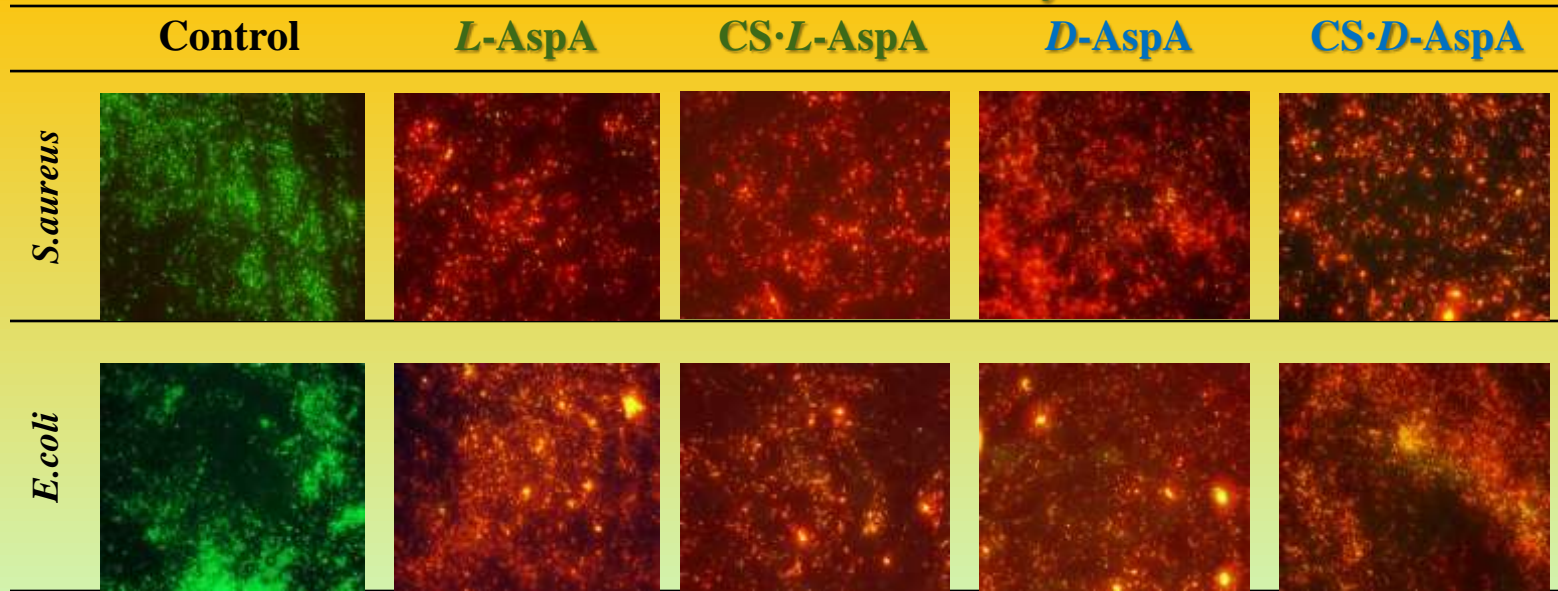

Fluorescent microscopy of cultures of *S. Aureus* 209 P and *E. Coli* 113-13 cultures in meat-peptone broth without (control) and with the addition of aqueous solutions of *L*-AspA, *D*-AspA, CS·*L*-AspA and CS·*D*-AspA; the molar ratio [AspA]/[~NH<sub>2</sub>] = 0.85 mol/monomol; 37°C, *t* = 24 hours.

Green fluorescence - viable cells; red fluorescence - dead cells. Magnification: x 400.

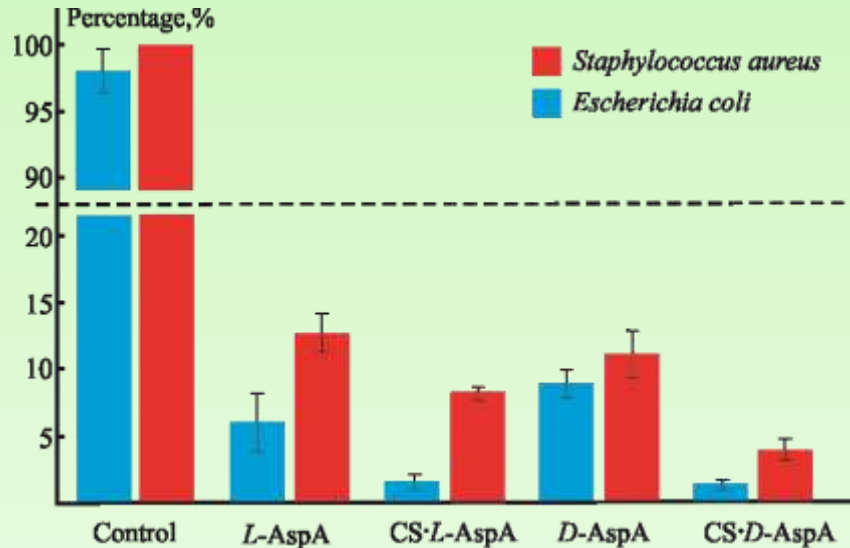

Number of living cells in cultures of *S. aureus* 209 P and *E. coli* 113-13 cultures after 24 hours of growth in meat-peptone broth without (control) and with the addition of aqueous solutions of *L*-AspA, *D*-AspA, CS·*L*-AspA and CS·*D*-AspA; the molar ratio [AspA]/[~NH<sub>2</sub>] = 0.85 mol/monomol; 37°C.

# Biostimulatory activity (laboratory conditions)

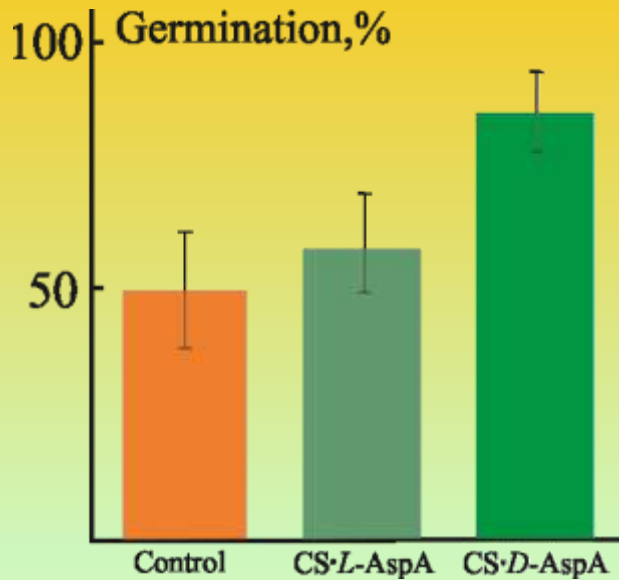

Germination of test seeds of *Linum usitatissimum* in laboratory conditions on aqueous extract from the initial soil-soil (control) and from the soil-soil after biodegradation ( $t = 40$  days) of hydrogel plates made from CS·L-AspA and CS·D-AspA obtained with the molar ratio  $[\text{AspA}]/[\sim\text{-NH}_2] = 1.0$  mol/monomol.

Photo of germinated test-seed of *Linum usitatissimum*

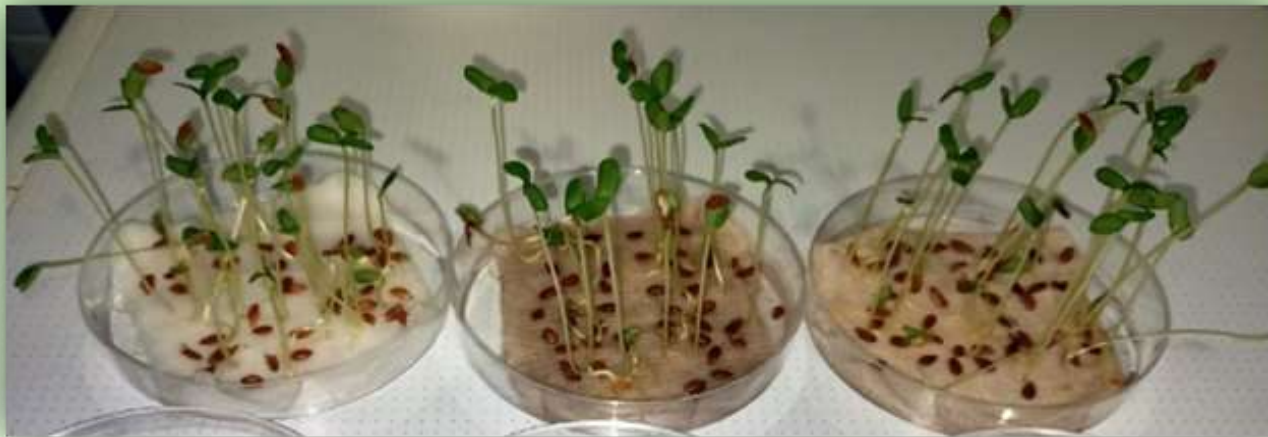

CS·L-AspA

H<sub>2</sub>O

CS·D-AspA

# Biostimulatory activity (field conditions)

| Sample test plants                | Irrigation liquid           | Time, days | Germination (field), % | Growth stimulating activity |                    |
|-----------------------------------|-----------------------------|------------|------------------------|-----------------------------|--------------------|
|                                   |                             |            |                        | Shoot height, mm            | Mass of shoots, kg |
| Radish<br><i>Raphanus sativus</i> | H <sub>2</sub> O            | 6          | 64±2                   | 2.5-3.0                     | –                  |
|                                   |                             | 10         | 76±4                   | 3.8-4.2                     | –                  |
|                                   |                             | 25         | –                      | 95-100                      | 1.03±0.04          |
|                                   | CS·L-Asp +H <sub>2</sub> O* | 6          | 90±3                   | 3.5-4.0                     | –                  |
|                                   |                             | 10         | 93±2                   | 6.0-8.0                     | –                  |
|                                   |                             | 25         | –                      | 105-115                     | 1.36±0.03          |
|                                   | CS·D-Asp+H <sub>2</sub> O*  | 6          | 92±2                   | 3.4-4.5                     | –                  |
|                                   |                             | 10         | 96±2                   | 6.5-8.3                     | –                  |
|                                   |                             | 25         | –                      | 110-120                     | 1.42±0.06          |
| Mustard<br><i>Sinapis alba</i>    | H <sub>2</sub> O            | 6          | 20±5                   | 4.5-5.0                     | –                  |
|                                   |                             | 10         | 75±5                   | 7.5-8.5                     | –                  |
|                                   |                             | 25         | –                      | 130-140                     | 0.61±0.03          |
|                                   | CS·L-Asp+H <sub>2</sub> O*  | 6          | 40±4                   | 5.0-7.0                     | –                  |
|                                   |                             | 10         | 85±3                   | 10.0-10.5                   | –                  |
|                                   |                             | 25         | –                      | 150-170                     | 0.82±0.02          |
|                                   | CS·D-Asp+H <sub>2</sub> O*  | 6          | 60±3                   | 6.0-8.0                     | –                  |
|                                   |                             | 10         | 90±1                   | 11.5-12.5                   | –                  |
|                                   |                             | 25         | –                      | 170-190                     | 0.85±0.01          |

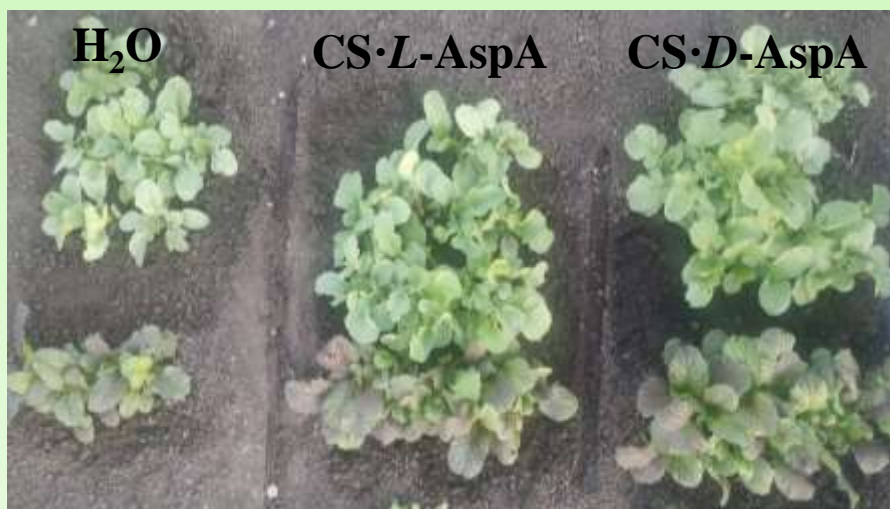

\*  $C_{CS} = 0.2 \cdot 10^{-3}$  monomol/dL,  
 $[AspA] / [ \sim\text{-NH}_2 ] = 1.0$  mol/monomol

Photo of a bed of radish (*Raphanus sativus*) and mustard (*Sinapis alba*) 25 days after planting in the field conditions (open ground), watered and sprinkled with a solution of CS·L-AscA and CS·D-AscA with  $C_{CS} = 0.2 \cdot 10^{-3}$  monomol/dL and the molar ratio composition  $[AspA] / [ \sim\text{-NH}_2 ] = 1.0$  mol/monomol.

*Raphanus sativus*

*Sinapis alba*

# Biostimulatory activity (field conditions)

Radish *Raphanus sativus*

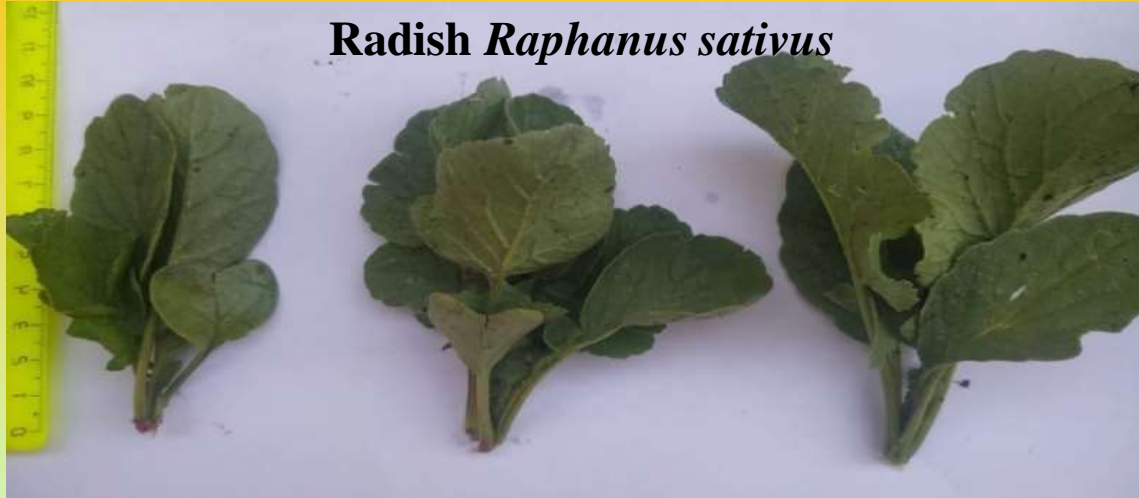

H<sub>2</sub>O

CS·L-AspA

CS·D-AspA

Mustard *Sinapis alba*

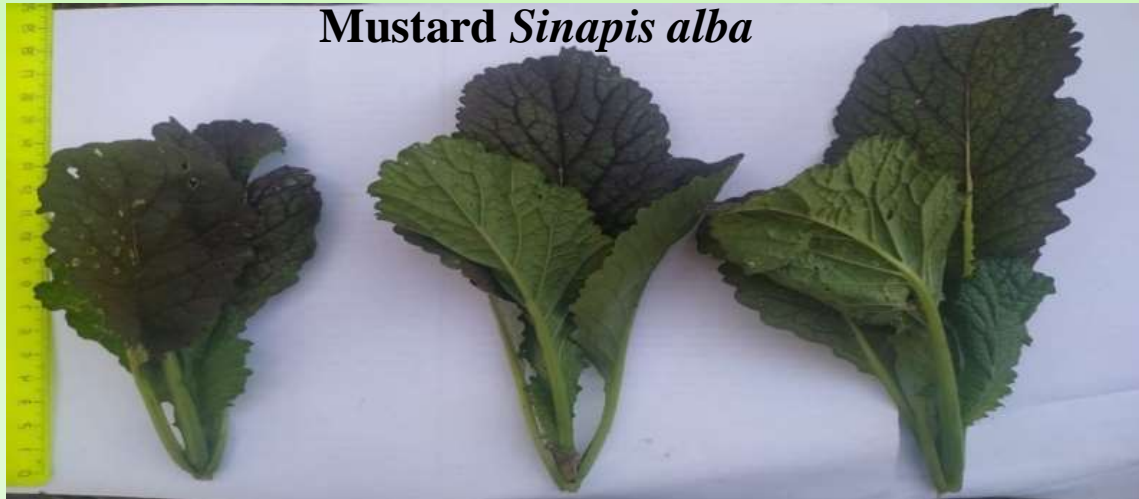

H<sub>2</sub>O

CS·L-AspA

CS·D-AspA

Photos of shoots of radish (*Raphanus sativus*) and mustard (*Sinapis alba*), cut off 25 days after planting in open ground, watered and sprinkled with a solution of CS·L-AscA and CS·D-AscA with  $C_{CS} = 0.2 \cdot 10^{-3}$  monomol/dL and the molar ratio  $[AspA]/[~-NH_2] = 1.0$  mol/monomol.

*Thank you for your attention!*

Department of Polymers, Saratov State University  
83 Astrakhanskaya St., Saratov 410012, Russian Federation

E-mail: [ShipovskayaAB@yandex.ru](mailto:ShipovskayaAB@yandex.ru)

Tel.: +7 (8452) 516-957
